# Supplementary material for: Aerosol delivery of SARS-CoV-2 human monoclonal antibodies in macaques limits viral replication and lung pathology
Source: PubMed Central journal article supplement (PMC10624670; doi:10.1038/s41467-023-42440-x), 2023-11-03
Supplement: 41467_2023_42440_MOESM1_ESM.pdf [file 41467_2023_42440_MOESM1_ESM.pdf]

## Supplementary Data

### **Aerosol Delivery of SARS-CoV-2 Human Monoclonal Antibodies in Macaques**

#### **Limits Viral Replication and Lung Pathology**

Daniel N. Streblow Ph.D.<sup>a</sup>, Alec J. Hirsch Ph.D.<sup>a</sup>, Jeffrey J. Stanton D.V.M.<sup>b</sup>, Anne D. Lewis D.V.M., Ph.D., DACVP<sup>b</sup>, Lois Colgin D.V.M., DACVP<sup>b</sup>, Ann J. Hessel Ph.D.<sup>b</sup>, Craig N. Kreklywich B.S.<sup>a</sup>, Jessica L. Smith Ph.D.<sup>a</sup>, William F. Sutton M.S.<sup>b</sup>, David Chauvin, Ph.D.<sup>c</sup>, Jennifer Woo, D.V.M, Ph.D.<sup>c</sup>, Benjamin N. Bimber Ph.D.<sup>b</sup>, Cierra N. LeBlanc B.S.<sup>d</sup>, Sonia N. Acharya Ph.D.<sup>d</sup>, Brian J. O’Roak Ph.D.<sup>d</sup>, Harjinder Sardar Ph.D.<sup>e</sup>, Mohammad M. Sajadi M.D.<sup>f</sup>, Zahra R. Tehrani Ph.D.<sup>g</sup>, Mark R. Walter, Ph.D.<sup>h</sup>, Luis Martinez-Sobrido, Ph.D.<sup>i</sup>, James J. Kobie Ph.D.<sup>j</sup>, Rachel J. Reader Ph.D. DACVP<sup>k</sup>, Katherine J. Olstad D.V.M. DACVP<sup>k</sup>, Theodore R. Hobbs D.V.M.<sup>b</sup>, Erica Ollmann Saphire Ph.D.<sup>l</sup>, Sharon L. Schendel Ph.D.<sup>l</sup>, Robert H. Carnahan Ph.D.<sup>m</sup>, Jonas Knoch M.Sc.<sup>n</sup>, Luis M. Branco, Ph.D.<sup>o</sup>, James E. Crowe, Jr. M.D.<sup>m</sup>, Koen K.A. Van Rompay D.V.M., Ph.D.<sup>k</sup>, Phillip Lovalenti Ph.D.<sup>c</sup>, Vu Truong Ph.D.<sup>c\*</sup>, Donald N. Forthal M.D.<sup>p\*</sup>, Nancy L. Haigwood Ph.D.<sup>b\*</sup>

## SUPPLEMENTARY FIGURES AND TABLES

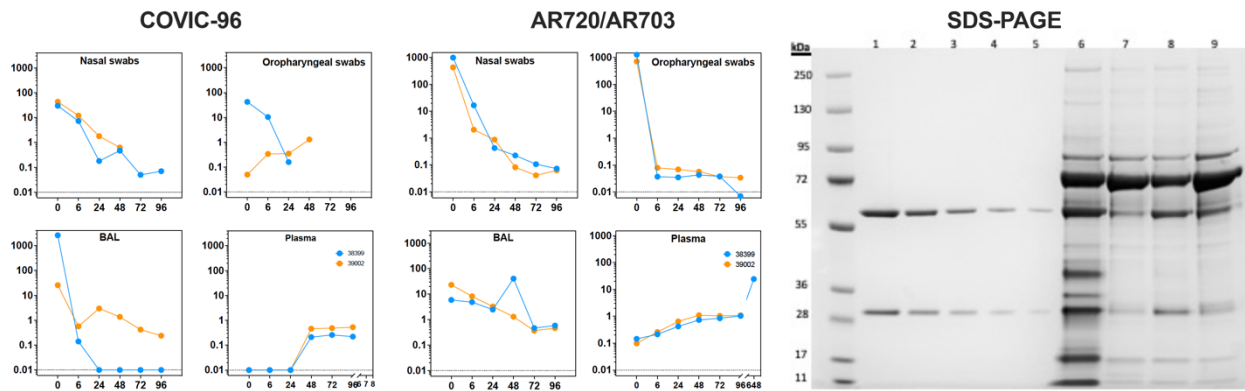

**Supplementary Figure 1. Administration of inhaled, nebulized mAb in uninfected macaques.** Qualitative measures of mAb concentrations as a function of time in fluids of macaques receiving nebulized mAbs. Concentrations of CoVIC-96 (left 4 panels) and ART720/AR703 (center 4 panels) in BAL, NAS, OAS, and blood plasma were quantified from clarified samples from each animal in the group (n=2) collected 0, 6, 24, 48, 72 and 96 hours post-treatment using antigen-specific quantitative ELISA. The colors blue and orange indicate samples from the two different animals in each group. ELISA assays were repeated at least twice with closely similar results. The right hand panel shows an SDS-PAGE gel stained with Novex SimplyBlue colloidal stain, showing anti-SARS-CoV-2 mAb combination standard loaded onto the gel (lanes 1-5 at 2, 1, 0.5, 0.25, and 0.125 µg) and BAL samples from macaques given the mAb combination at a dose of 37.5 mg/kg. Animal 38399, 0 h after aerosol delivery (lane 6) and 6 h after delivery (lane 7). Animal 39002, 0 h after aerosol delivery (lane 8) and 6 h after delivery (lane 9). Stained gels were repeated twice with similar results.

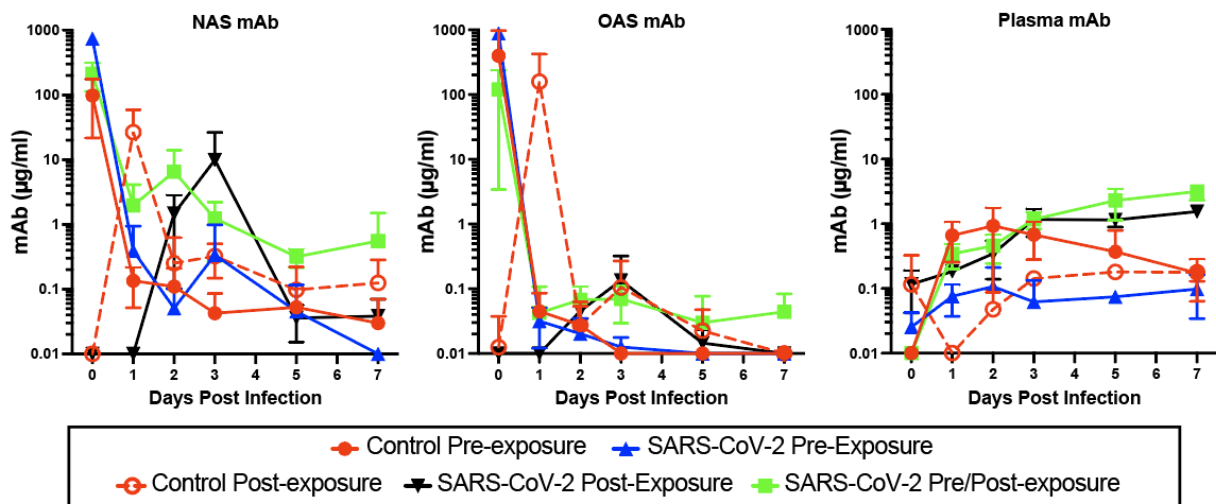

**Supplementary Figure 2. Detection of inhaled, nebulized mAbs in NAS, OAS and blood plasma.** Qualitative measures of control anti-RSV and anti-SARS-CoV-2 ART720/AR703 mAbs in NAS, OAS, and blood plasma were determined from clarified samples from each animal in the group (n=4 animals/group) collected at 0, 1, 3, 5, and 7 dpi using antigen specific quantitative ELISA. Graphs are labeled at the top by sample type tested. Individual data points for each animal within each group are shown as the mean and SEM for each group. The key for colors and symbols is provided below the graphs.

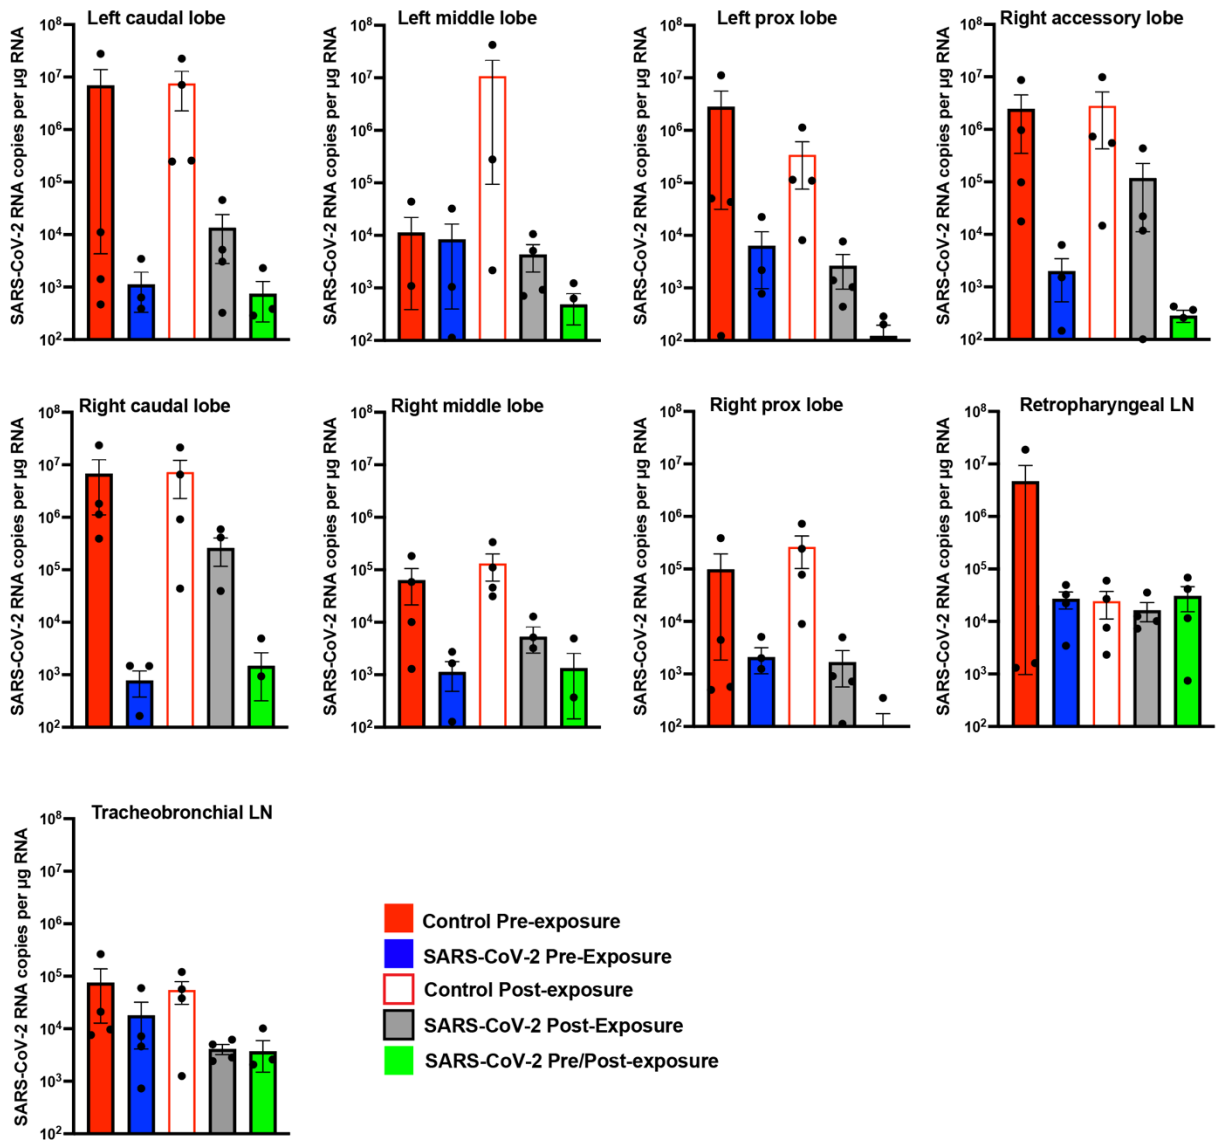

**Supplementary Figure 3. Inhaled aerosolized Anti-SARS-CoV-2 mAb treatment blocks SARS-CoV-2 replication in respiratory tissues.** RNA was extracted from respiratory tract tissues and viral RNA levels were determined by qRT-PCR using SARS-CoV-2-specific primers and probes. Individual data points are shown for each animal within each group (n=4 animals per group) and the mean and SEM for each group is indicated. The identity of each bar is indicated by a key, shown next to the graph.

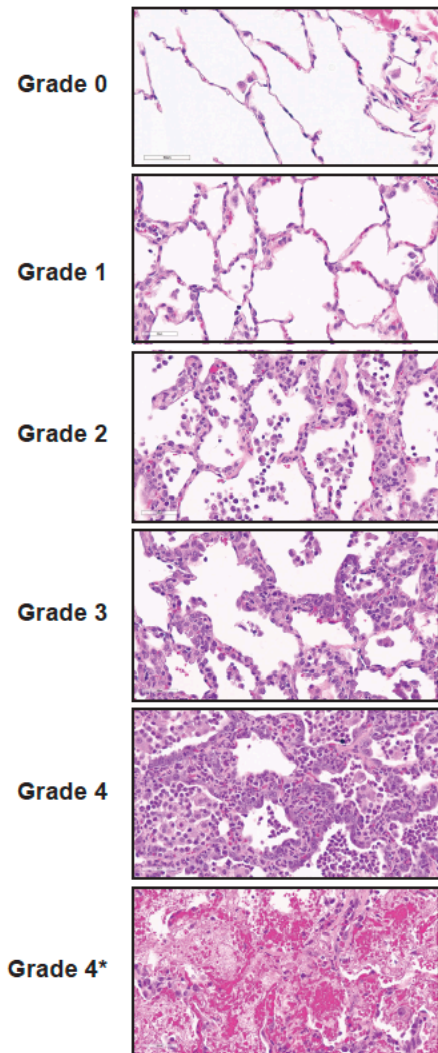

**Supplementary Figure 4. Lung pathology scoring system.** Slides containing section(s) of lung were scanned at 40x with an Aperio AT2 Leica Biosystems microscope slide scanner. A semiquantitative, scoring system was developed by assessing the interstitial cellularity of the alveolar septa. An initial score reflecting the most severely affected area was assigned to each lung lobe evaluated and illustrated in the photomicrographs. The scoring system was as follows: 0 = Normal cellularity; 1 = 1-2 cells thick; 2 = 2-4 cells thick; 3 = 4-6 cells thick; and 4 = > 6 cells thick or necrohemorrhagic lesions (Van Rompay et al. 2022<sup>1</sup>). The percentage of the tissue exhibiting any degree of increased cellularity and inflammation was estimated. Final scores for each lung lobe were obtained by multiplying the initial scores by the percentage of the tissue sections affected. If the percentage of the lung affected was less than 10%, a final score of 0 was assigned. An average score for each animal was calculated by combining the final scores of all lung lobes divided by the number of slides evaluated. Scale bar = 50 μm for all pictures.

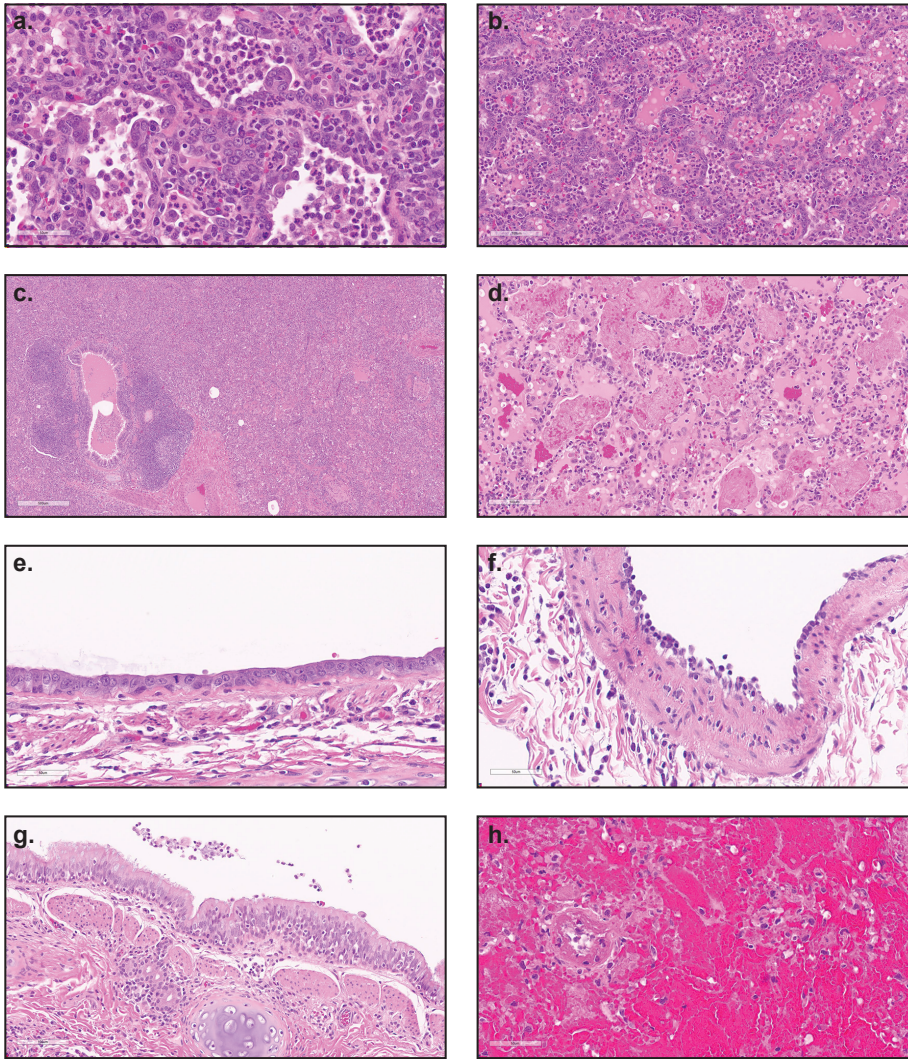

**Supplementary Figure 5. Examples of types of lung pathology.** Lung tissue sections were stained with hematoxylin and eosin (H&E). a) Prominent type-II pneumocyte hyperplasia, syncytia formation and alveoli filled with macrophages and neutrophils. Scale bar = 50  $\mu\text{m}$ . b) Diffuse type-II pneumocyte hyperplasia and alveoli filled with neutrophils and macrophages admixed with protein-rich edema fluid. Scale bar = 100  $\mu\text{m}$ . c) Bronchus-associated lymphoid hyperplasia with lymphofollicular formation. Bronchial lumen contains macrophages and neutrophils admixed with protein-rich fluid. Scale bar = 500  $\mu\text{m}$ . d) Necrotizing hemorrhagic, fibrinous interstitial pneumonia with septal necrosis, and alveoli filled with dense mats of fibrin, hemorrhage and edema fluid. Scale bar = 100  $\mu\text{m}$ . e) Bronchiole lined by attenuated epithelium with ciliary loss. Scale bar = 50  $\mu\text{m}$ . f) Intrapulmonary vessel exhibiting endothelial hypertrophy, rounding up of endothelial cells and disruption of endothelium with infiltrating leukocytes. Scale bar = 50  $\mu\text{m}$ . g) Bronchus lined by hyperplastic epithelium with lymphocytic infiltration. Scale bar = 100  $\mu\text{m}$ . h) Intrapulmonary artery with fibrinoid necrosis of vascular wall with severe hemorrhage and necrosis of surrounding tissue. Scale bar = 50  $\mu\text{m}$ .

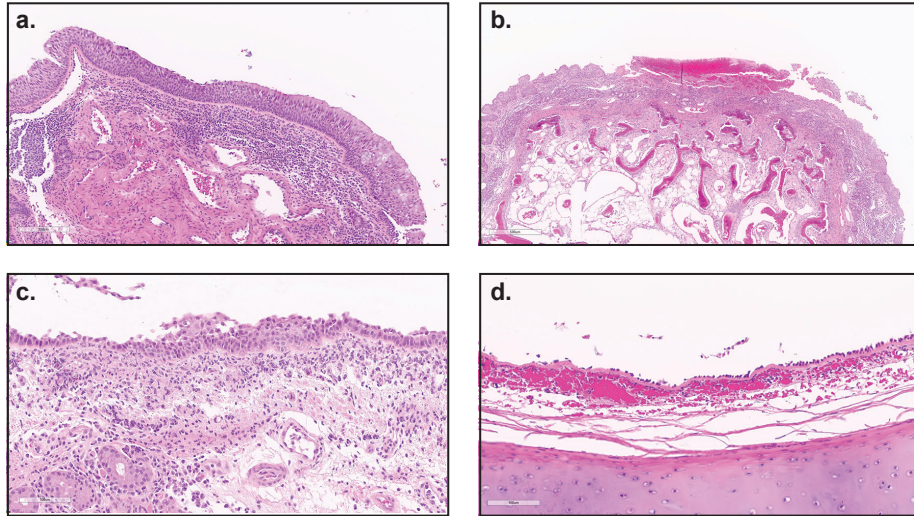

**Supplementary Figure 6. Examples of upper airway and tracheal pathology.** Tissue sections were stained with H&E. a) Nasal mucosa tissues with lymphocytic infiltration of epithelium, multifocal ciliary loss, moderate plasmacytic and lymphocytic inflammation in the lamina propria. Scale bar = 200  $\mu\text{m}$ . b) Nasal mucosa with erosion and ulceration, luminal hemorrhage, luminal neutrophilic exudate. Scale bar = 500  $\mu\text{m}$ . c) Trachea epithelial erosion and mixed inflammatory infiltrate (lymphocytes, plasma cells and macrophages) in the lamina propria. Scale bar = 100  $\mu\text{m}$ . d) Trachea epithelial denudation with proprial hemorrhage, congestion and edema. Scale bar = 100  $\mu\text{m}$ .

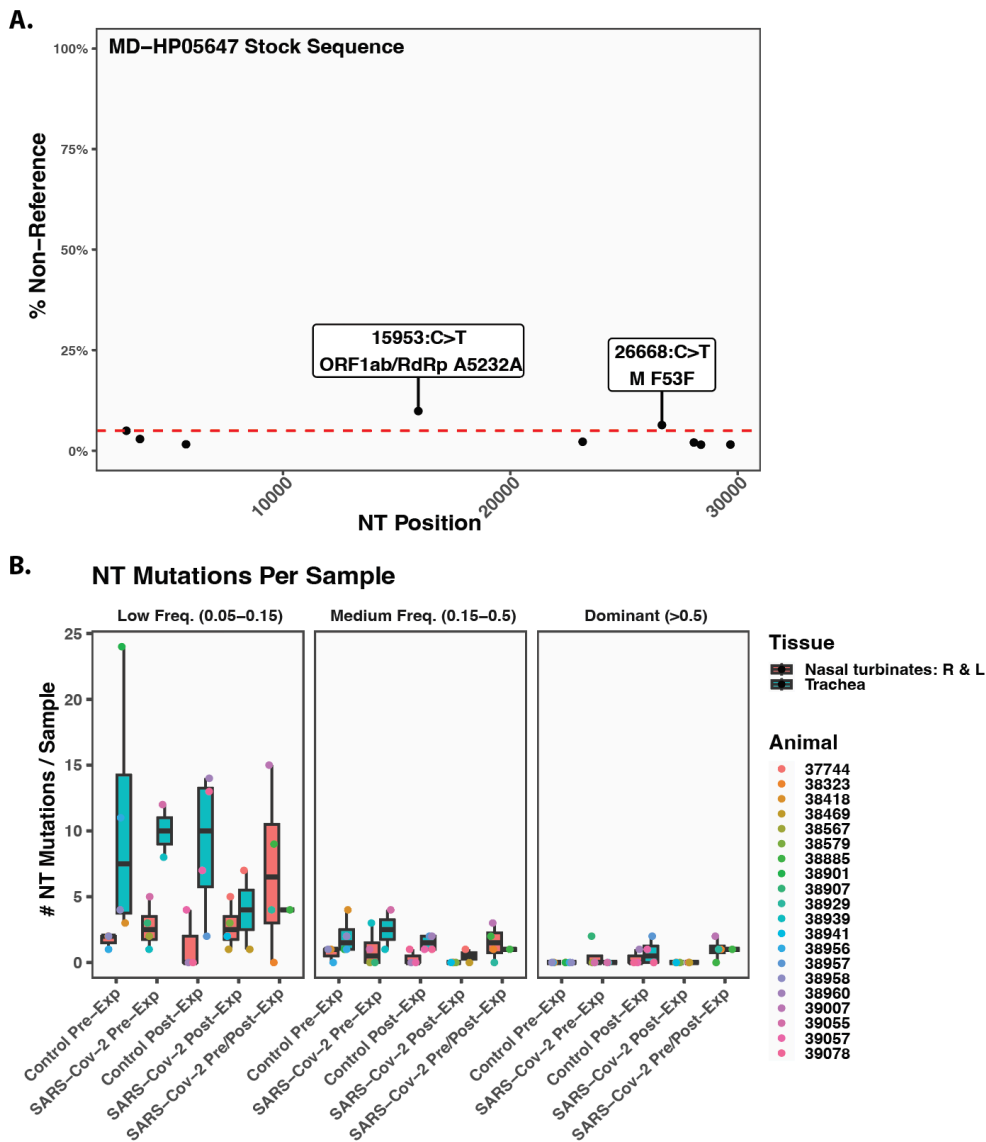

**Supplementary Figure 7. Effect of Inhaled Aerosolized Anti-SARS-CoV-2 mAb Treatment on SARS-CoV-2 Evolution.** (A) Viral RNA was isolated from the challenge stock, followed by an amplicon-based sequencing approach, high-depth Illumina sequencing and alignment to the reference sequence. The graph displays the fraction of non-reference bases detected at each genomic position. The dotted red line denotes 5% of total reads. A total of two nucleotide positions were detected with mutations in >5% of reads, which are labeled with the nucleotide and predicted amino acid changes. (B) Viral RNA was isolated from nasal turbinates and trachea tissues, followed by amplicon-based sequencing. The box plot summarizes the total number of nucleotide mutations detected in each sample, categorized by the frequency of each mutation. Very few medium frequency or dominant mutations were detected, with no significant differences between cohorts. The majority of samples contained low-frequency mutations. Key on the right shows a unique color that was assigned to each animal.

**Supplementary Table 1. Deep Sequence Analysis of SARS-CoV-2 Delta in Nasal Turbinates and Trachea from Control mAb Pre-exposure Treatment Group**

| Cohort          | Animal | Tissue                  | Start | Ref | AltAlleles | Depth | Freq  | ORF        | Protein                                       | Amino Acid   | Category       |
|-----------------|--------|-------------------------|-------|-----|------------|-------|-------|------------|-----------------------------------------------|--------------|----------------|
| Control Pre-Exp | 38418  | Nasal turbinates: R & L | 4449  | C   | T          | 302   | 6.0%  | ORF1ab     | GU280_gp01,nsp3                               | p.Ala1397Ala | Synonymous     |
| Control Pre-Exp | 38418  | Nasal turbinates: R & L | 15953 | C   | T          | 591   | 14.9% | ORF1ab     | GU280_gp01,RNA-dependent_RNA_polymerase       | p.Ala5232Ala | Synonymous     |
| Control Pre-Exp | 38418  | Nasal turbinates: R & L | 20714 | A   | G          | 125   | 31.2% | ORF1ab     | 2'-O-ribose_methyltransferase,GU280_gp01      | p.Leu6819Leu | Synonymous     |
| Control Pre-Exp | 38418  | Trachea                 | 9586  | T   | C          | 507   | 27.6% | ORF1ab     | GU280_gp01,nsp4                               | p.Leu3110Leu | Synonymous     |
| Control Pre-Exp | 38418  | Trachea                 | 9828  | T   | C          | 682   | 28.2% | ORF1ab     | GU280_gp01,nsp4                               | p.Tyr3190Tyr | Synonymous     |
| Control Pre-Exp | 38418  | Trachea                 | 14315 | C   | T          | 409   | 18.3% | ORF1ab     | GU280_gp01,RNA-dependent_RNA_polymerase       | p.Tyr4686Tyr | Synonymous     |
| Control Pre-Exp | 38418  | Trachea                 | 21938 | T   | C          | 783   | 22.9% | S          | GU280_gp02                                    | p.Ile128Thr  | Non-synonymous |
| Control Pre-Exp | 38418  | Trachea                 | 22278 | T   | C          | 739   | 14.2% | S          | GU280_gp02                                    | p.Ala241Ala  | Synonymous     |
| Control Pre-Exp | 38418  | Trachea                 | 24482 | A   | G          | 144   | 12.5% | S          | GU280_gp02                                    | p.Asn976Ser  | Non-synonymous |
| Control Pre-Exp | 38418  | Trachea                 | 29558 | C   | A          | 439   | 8.2%  | ORF10      | GU280_gp11                                    | p.Phe7Leu    | Non-synonymous |
| Control Pre-Exp | 38901  | Trachea                 | 959   | A   | G          | 95    | 6.3%  | ORF1ab     | GU280_gp01,nsp2                               | p.His234Arg  | Non-synonymous |
| Control Pre-Exp | 38901  | Trachea                 | 3761  | C   | T          | 223   | 7.2%  | ORF1ab     | GU280_gp01,nsp3                               | p.Thr1168Ile | Non-synonymous |
| Control Pre-Exp | 38901  | Trachea                 | 4103  | A   | T          | 171   | 6.4%  | ORF1ab     | GU280_gp01,nsp3                               | p.Asp1282Val | Non-synonymous |
| Control Pre-Exp | 38901  | Trachea                 | 4743  | A   | G          | 162   | 11.7% | ORF1ab     | GU280_gp01,nsp3                               | p.Lys1495Lys | Synonymous     |
| Control Pre-Exp | 38901  | Trachea                 | 5987  | A   | G          | 149   | 9.4%  | ORF1ab     | GU280_gp01,nsp3                               | p.Gln1910Arg | Non-synonymous |
| Control Pre-Exp | 38901  | Trachea                 | 6518  | C   | T          | 124   | 6.5%  | ORF1ab     | GU280_gp01,nsp3                               | p.Thr2087Ile | Non-synonymous |
| Control Pre-Exp | 38901  | Trachea                 | 7494  | T   | C          | 68    | 7.4%  | ORF1ab     | GU280_gp01,nsp3                               | p.Cys2412Cys | Synonymous     |
| Control Pre-Exp | 38901  | Trachea                 | 8151  | T   | C          | 86    | 8.1%  | ORF1ab     | GU280_gp01,nsp3                               | p.Ser2631Ser | Synonymous     |
| Control Pre-Exp | 38901  | Trachea                 | 8292  | C   | T          | 104   | 10.6% | ORF1ab     | GU280_gp01,nsp3                               | p.Asn2678Asn | Synonymous     |
| Control Pre-Exp | 38901  | Trachea                 | 10615 | A   | G          | 656   | 8.8%  | ORF1ab     | 3C-like_proteinase,GU280_gp01                 | p.Thr3453Ala | Non-synonymous |
| Control Pre-Exp | 38901  | Trachea                 | 11164 | C   | T          | 349   | 9.7%  | ORF1ab     | GU280_gp01,nsp6                               | p.Leu3636Phe | Non-synonymous |
| Control Pre-Exp | 38901  | Trachea                 | 11318 | C   | T          | 485   | 11.8% | ORF1ab     | GU280_gp01,nsp6                               | p.Ser3687Leu | Non-synonymous |
| Control Pre-Exp | 38901  | Trachea                 | 12095 | C   | T          | 333   | 6.9%  | ORF1ab     | GU280_gp01,nsp8                               | p.Ser3946Leu | Non-synonymous |
| Control Pre-Exp | 38901  | Trachea                 | 13495 | C   | T          | 332   | 25.6% | ORF1ab     | GU280_gp01,RNA-dependent_RNA_polymerase       | p.Pro4413Leu | Non-synonymous |
| Control Pre-Exp | 38901  | Trachea                 | 15447 | T   | C          | 54    | 7.4%  | ORF1ab     | GU280_gp01,RNA-dependent_RNA_polymerase       | p.Ser5064Pro | Non-synonymous |
| Control Pre-Exp | 38901  | Trachea                 | 15953 | C   | T          | 117   | 5.1%  | ORF1ab     | GU280_gp01,RNA-dependent_RNA_polymerase       | p.Ala5232Ala | Synonymous     |
| Control Pre-Exp | 38901  | Trachea                 | 17315 | A   | G          | 112   | 5.4%  | ORF1ab     | GU280_gp01,helicase                           | p.Ala5686Ala | Synonymous     |
| Control Pre-Exp | 38901  | Trachea                 | 20687 | T   | C          | 95    | 7.4%  | ORF1ab     | 2'-O-ribose_methyltransferase,GU280_gp01      | p.Pro6810Pro | Synonymous     |
| Control Pre-Exp | 38901  | Trachea                 | 22263 | T   | C          | 395   | 8.4%  | S          | GU280_gp02                                    | p.Phe236Phe  | Synonymous     |
| Control Pre-Exp | 38901  | Trachea                 | 22485 | C   | T          | 230   | 9.1%  | S          | GU280_gp02                                    | p.Ile310Ile  | Synonymous     |
| Control Pre-Exp | 38901  | Trachea                 | 24155 | T   | C          | 156   | 5.1%  | S          | GU280_gp02                                    | p.Met867Thr  | Non-synonymous |
| Control Pre-Exp | 38901  | Trachea                 | 24575 | C   | T          | 65    | 9.2%  | S          | GU280_gp02                                    | p.Thr1007Ile | Non-synonymous |
| Control Pre-Exp | 38901  | Trachea                 | 24803 | G   | A          | 196   | 8.2%  | S          | GU280_gp02                                    | p.Gly1083Glu | Non-synonymous |
| Control Pre-Exp | 38901  | Trachea                 | 25171 | C   | T          | 223   | 11.2% | S          | GU280_gp02                                    | p.Gln1206*   | Non-synonymous |
| Control Pre-Exp | 38901  | Trachea                 | 26668 | C   | T          | 286   | 9.1%  | M          | GU280_gp05                                    | p.Phe53Phe   | Synonymous     |
| Control Pre-Exp | 38956  | Nasal turbinates: R & L | 28367 | A   | C          | 1641  | 7.7%  | N          | GU280_gp10                                    | p.Lys38Asn   | Non-synonymous |
| Control Pre-Exp | 38956  | Trachea                 | 71    | T   | A          | 76    | 7.9%  | NON-CODING | NON-CODING                                    |              |                |
| Control Pre-Exp | 38956  | Trachea                 | 1955  | C   | T          | 76    | 5.3%  | ORF1ab     | GU280_gp01,nsp2                               | p.Ala566Val  | Non-synonymous |
| Control Pre-Exp | 38956  | Trachea                 | 3565  | T   | G          | 164   | 6.7%  | ORF1ab     | GU280_gp01,nsp3                               | p.Cys1103Gly | Non-synonymous |
| Control Pre-Exp | 38956  | Trachea                 | 3714  | T   | C          | 155   | 6.5%  | ORF1ab     | GU280_gp01,nsp3                               | p.Gly1152Gly | Synonymous     |
| Control Pre-Exp | 38956  | Trachea                 | 4318  | T   | C          | 196   | 11.7% | ORF1ab     | GU280_gp01,nsp3                               | p.Tyr1354His | Non-synonymous |
| Control Pre-Exp | 38956  | Trachea                 | 5173  | G   | A          | 149   | 5.4%  | ORF1ab     | GU280_gp01,nsp3                               | p.Asp1639Asn | Non-synonymous |
| Control Pre-Exp | 38956  | Trachea                 | 13453 | T   | C          | 581   | 6.7%  | ORF1ab     | GU280_gp01,nsp11,RNA-dependent_RNA_polymerase | p.Phe4399Leu | Non-synonymous |
| Control Pre-Exp | 38956  | Trachea                 | 15953 | C   | T          | 140   | 10.0% | ORF1ab     | GU280_gp01,RNA-dependent_RNA_polymerase       | p.Ala5232Ala | Synonymous     |
| Control Pre-Exp | 38956  | Trachea                 | 18130 | T   | C          | 542   | 5.5%  | ORF1ab     | 3'-to-5'_exonuclease,GU280_gp01               | p.Phe5958Ser | Non-synonymous |
| Control Pre-Exp | 38956  | Trachea                 | 22060 | G   | C          | 353   | 5.1%  | S          | GU280_gp02                                    | p.Val169Leu  | Non-synonymous |
| Control Pre-Exp | 38956  | Trachea                 | 23894 | T   | C          | 268   | 7.5%  | S          | GU280_gp02                                    | p.Phe780Ser  | Non-synonymous |
| Control Pre-Exp | 38956  | Trachea                 | 26668 | C   | T          | 149   | 16.1% | M          | GU280_gp05                                    | p.Phe53Phe   | Synonymous     |
| Control Pre-Exp | 38958  | Nasal turbinates: R & L | 5805  | C   | T          | 383   | 24.8% | ORF1ab     | GU280_gp01,nsp3                               | p.Asp1849Asp | Synonymous     |
| Control Pre-Exp | 38958  | Nasal turbinates: R & L | 15953 | C   | T          | 824   | 6.9%  | ORF1ab     | GU280_gp01,RNA-dependent_RNA_polymerase       | p.Ala5232Ala | Synonymous     |
| Control Pre-Exp | 38958  | Nasal turbinates: R & L | 19306 | C   | T          | 256   | 11.7% | ORF1ab     | 3'-to-5'_exonuclease,GU280_gp01               | p.Ala6350Val | Non-synonymous |
| Control Pre-Exp | 38958  | Trachea                 | 6099  | T   | C          | 279   | 8.2%  | ORF1ab     | GU280_gp01,nsp3                               | p.Tyr1947Tyr | Synonymous     |
| Control Pre-Exp | 38958  | Trachea                 | 6276  | T   | C          | 228   | 8.3%  | ORF1ab     | GU280_gp01,nsp3                               | p.Asn2006Asn | Synonymous     |
| Control Pre-Exp | 38958  | Trachea                 | 6746  | G   | A          | 107   | 5.6%  | ORF1ab     | GU280_gp01,nsp3                               | p.Arg2163His | Non-synonymous |
| Control Pre-Exp | 38958  | Trachea                 | 20755 | C   | T          | 122   | 27.0% | ORF1ab     | 2'-O-ribose_methyltransferase,GU280_gp01      | p.Thr6833Ile | Non-synonymous |
| Control Pre-Exp | 38958  | Trachea                 | 23973 | T   | C          | 439   | 10.9% | S          | GU280_gp02                                    | p.Asp806Asp  | Synonymous     |
| Control Pre-Exp | 38958  | Trachea                 | 26692 | T   | C          | 389   | 16.7% | M          | GU280_gp05                                    | p.Thr61Thr   | Synonymous     |



**Supplementary Table 2. Deep Sequence Analysis of SARS-CoV-2 Delta in Nasal Turbinates and Trachea from AR-701 mAb Pre-exposure Treatment Group**

| Cohort             | Animal | Tissue                  | Start | Ref | AltAlleles | Depth | Freq  | ORF     | Protein                                 | Amino Acid   | Category       |
|--------------------|--------|-------------------------|-------|-----|------------|-------|-------|---------|-----------------------------------------|--------------|----------------|
| SARS-Cov-2 Pre-Exp | 38567  | Nasal turbinates: R & L | 4449  | C   | T          | 247   | 12.1% | ORF1ab  | GU280_gp01,ns3                          | p.Ala1397Ala | Synonymous     |
| SARS-Cov-2 Pre-Exp | 38567  | Nasal turbinates: R & L | 28074 | C   | T          | 1128  | 10.6% | ORF8    | GU280_gp09                              | p.Ala65Val   | Non-synonymous |
| SARS-Cov-2 Pre-Exp | 38907  | Nasal turbinates: R & L | 5232  | C   | T          | 257   | 80.9% | ORF1ab  | GU280_gp01,ns3                          | p.Tyr1658Tyr | Synonymous     |
| SARS-Cov-2 Pre-Exp | 38907  | Nasal turbinates: R & L | 15755 | T   | C          | 916   | 5.2%  | ORF1ab  | GU280_gp01,RNA-dependent_RNA_polymerase | p.Gly5166Gly | Synonymous     |
| SARS-Cov-2 Pre-Exp | 38907  | Nasal turbinates: R & L | 15953 | C   | T          | 1342  | 81.1% | ORF1ab  | GU280_gp01,RNA-dependent_RNA_polymerase | p.Ala5232Ala | Synonymous     |
| SARS-Cov-2 Pre-Exp | 38907  | Nasal turbinates: R & L | 26668 | C   | T          | 651   | 14.9% | M       | GU280_gp05                              | p.Phe53Phe   | Synonymous     |
| SARS-Cov-2 Pre-Exp | 38907  | Nasal turbinates: R & L | 29607 | C   | T          | 684   | 7.2%  | ORF10   | GU280_gp11                              | p.Arg24Cys   | Non-synonymous |
| SARS-Cov-2 Pre-Exp | 38939  | Nasal turbinates: R & L | 3048  | T   | C          | 247   | 18.2% | ORF1ab  | GU280_gp01,ns3                          | p.Asp930Asp  | Synonymous     |
| SARS-Cov-2 Pre-Exp | 38939  | Nasal turbinates: R & L | 11332 | C   | T          | 1031  | 5.0%  | ORF1ab  | GU280_gp01,ns3                          | p.Leu3692Leu | Synonymous     |
| SARS-Cov-2 Pre-Exp | 38939  | Nasal turbinates: R & L | 17390 | C   | T          | 343   | 16.9% | ORF1ab  | GU280_gp01,helicase                     | p.Val5711Val | Synonymous     |
| SARS-Cov-2 Pre-Exp | 38939  | Nasal turbinates: R & L | 28074 | C   | T          | 2095  | 22.2% | ORF8    | GU280_gp09                              | p.Ala65Val   | Non-synonymous |
| SARS-Cov-2 Pre-Exp | 38939  | Trachea                 | 3254  | C   | T          | 350   | 5.1%  | ORF1ab  | GU280_gp01,ns3                          | p.Thr999Ile  | Non-synonymous |
| SARS-Cov-2 Pre-Exp | 38939  | Trachea                 | 3582  | C   | T          | 842   | 6.2%  | ORF1ab  | GU280_gp01,ns3                          | p.His1108His | Synonymous     |
| SARS-Cov-2 Pre-Exp | 38939  | Trachea                 | 3710  | C   | A          | 700   | 13.9% | ORF1ab  | GU280_gp01,ns3                          | p.Ala1151Asp | Non-synonymous |
| SARS-Cov-2 Pre-Exp | 38939  | Trachea                 | 4378  | A   | C          | 444   | 7.7%  | ORF1ab  | GU280_gp01,ns3                          | p.Asn1374His | Non-synonymous |
| SARS-Cov-2 Pre-Exp | 38939  | Trachea                 | 11332 | C   | T          | 861   | 35.8% | ORF1ab  | GU280_gp01,ns3                          | p.Leu3692Leu | Synonymous     |
| SARS-Cov-2 Pre-Exp | 38939  | Trachea                 | 12225 | T   | A          | 825   | 5.3%  | ORF1ab  | GU280_gp01,ns3                          | p.Ser3989Ser | Synonymous     |
| SARS-Cov-2 Pre-Exp | 38939  | Trachea                 | 15000 | G   | C          | 229   | 10.5% | ORF1ab  | GU280_gp01,RNA-dependent_RNA_polymerase | p.Asp4915His | Non-synonymous |
| SARS-Cov-2 Pre-Exp | 38939  | Trachea                 | 20027 | T   | A          | 84    | 7.1%  | ORF1ab  | endoRNase,GU280_gp01                    | p.Arg6590Arg | Synonymous     |
| SARS-Cov-2 Pre-Exp | 38939  | Trachea                 | 29525 | C   | T          | 1386  | 7.1%  | N-ORF10 | GU280_gp10-GU280_gp11                   |              |                |
| SARS-Cov-2 Pre-Exp | 39055  | Nasal turbinates: R & L | 586   | C   | T          | 596   | 7.7%  | ORF1ab  | GU280_gp01,leader_protein               | p.His110Tyr  | Non-synonymous |
| SARS-Cov-2 Pre-Exp | 39055  | Nasal turbinates: R & L | 3102  | G   | T          | 209   | 9.1%  | ORF1ab  | GU280_gp01,ns3                          | p.Glu948Asp  | Non-synonymous |
| SARS-Cov-2 Pre-Exp | 39055  | Nasal turbinates: R & L | 4267  | T   | C          | 292   | 6.5%  | ORF1ab  | GU280_gp01,ns3                          | p.Tyr1337His | Non-synonymous |
| SARS-Cov-2 Pre-Exp | 39055  | Nasal turbinates: R & L | 6098  | A   | G          | 420   | 11.9% | ORF1ab  | GU280_gp01,ns3                          | p.Tyr1947Cys | Non-synonymous |
| SARS-Cov-2 Pre-Exp | 39055  | Nasal turbinates: R & L | 7827  | C   | T          | 410   | 6.1%  | ORF1ab  | GU280_gp01,ns3                          | p.Asn2523Asn | Synonymous     |
| SARS-Cov-2 Pre-Exp | 39055  | Nasal turbinates: R & L | 15953 | C   | T          | 835   | 15.6% | ORF1ab  | GU280_gp01,RNA-dependent_RNA_polymerase | p.Ala5232Ala | Synonymous     |
| SARS-Cov-2 Pre-Exp | 39055  | Trachea                 | 3532  | G   | A          | 579   | 5.5%  | ORF1ab  | GU280_gp01,ns3                          | p.Ala1092Thr | Non-synonymous |
| SARS-Cov-2 Pre-Exp | 39055  | Trachea                 | 5137  | C   | T          | 124   | 26.6% | ORF1ab  | GU280_gp01,ns3                          | p.Leu1627Leu | Synonymous     |
| SARS-Cov-2 Pre-Exp | 39055  | Trachea                 | 7790  | A   | G          | 261   | 12.3% | ORF1ab  | GU280_gp01,ns3                          | p.Lys2511Arg | Non-synonymous |
| SARS-Cov-2 Pre-Exp | 39055  | Trachea                 | 9662  | T   | C          | 851   | 6.2%  | ORF1ab  | GU280_gp01,ns3                          | p.Leu3135Ser | Non-synonymous |
| SARS-Cov-2 Pre-Exp | 39055  | Trachea                 | 11697 | C   | T          | 451   | 8.2%  | ORF1ab  | GU280_gp01,ns3                          | p.Tyr3813Tyr | Synonymous     |
| SARS-Cov-2 Pre-Exp | 39055  | Trachea                 | 12248 | T   | C          | 758   | 7.4%  | ORF1ab  | GU280_gp01,ns3                          | p.Met3997Thr | Non-synonymous |
| SARS-Cov-2 Pre-Exp | 39055  | Trachea                 | 12486 | C   | T          | 537   | 16.4% | ORF1ab  | GU280_gp01,ns3                          | p.Asp4076Asp | Synonymous     |
| SARS-Cov-2 Pre-Exp | 39055  | Trachea                 | 14030 | T   | A          | 1175  | 5.2%  | ORF1ab  | GU280_gp01,RNA-dependent_RNA_polymerase | p.Ala4591Ala | Synonymous     |
| SARS-Cov-2 Pre-Exp | 39055  | Trachea                 | 16995 | C   | G          | 74    | 20.3% | ORF1ab  | GU280_gp01,helicase                     | p.Leu5580Val | Non-synonymous |
| SARS-Cov-2 Pre-Exp | 39055  | Trachea                 | 17789 | T   | C          | 672   | 6.3%  | ORF1ab  | GU280_gp01,helicase                     | p.Ala5844Ala | Synonymous     |
| SARS-Cov-2 Pre-Exp | 39055  | Trachea                 | 19285 | G   | T          | 725   | 6.5%  | ORF1ab  | 3'-to-5'_exonuclease,GU280_gp01         | p.Ser6343Ile | Non-synonymous |
| SARS-Cov-2 Pre-Exp | 39055  | Trachea                 | 19323 | T   | C          | 603   | 10.6% | ORF1ab  | 3'-to-5'_exonuclease,GU280_gp01         | p.Phe6356Leu | Non-synonymous |
| SARS-Cov-2 Pre-Exp | 39055  | Trachea                 | 22754 | T   | C          | 695   | 8.8%  | S       | GU280_gp02                              | p.Ile400Thr  | Non-synonymous |
| SARS-Cov-2 Pre-Exp | 39055  | Trachea                 | 24845 | G   | T          | 211   | 13.7% | S       | GU280_gp02                              | p.Gly1097Val | Non-synonymous |
| SARS-Cov-2 Pre-Exp | 39055  | Trachea                 | 25087 | C   | A          | 203   | 28.6% | S       | GU280_gp02                              | p.Gln1178Lys | Non-synonymous |
| SARS-Cov-2 Pre-Exp | 39055  | Trachea                 | 26635 | G   | T          | 396   | 7.3%  | M       | GU280_gp05                              | p.Arg425Ser  | Non-synonymous |

**Supplementary Table 3. Deep Sequence Analysis of SARS-CoV-2 Delta in Nasal Turbinates and Trachea from Control mAb Post-exposure Treatment Group**

| Cohort           | Animal | Tissue                  | Start | Ref | AltAlleles | Depth | Freq   | ORF        | Protein                                  | Amino Acid   | Category       |
|------------------|--------|-------------------------|-------|-----|------------|-------|--------|------------|------------------------------------------|--------------|----------------|
| Control Post-Exp | 38957  | Trachea                 | 619   | G   | A          | 110   | 27.3%  | ORF1ab     | GU280_gp01,leader_protein                | p.Val121Ile  | Non-synonymous |
| Control Post-Exp | 38957  | Trachea                 | 11060 | C   | T          | 519   | 40.5%  | ORF1ab     | GU280_gp01,nsp6                          | p.Ser3601Phe | Non-synonymous |
| Control Post-Exp | 38957  | Trachea                 | 24736 | T   | C          | 128   | 97.7%  | S          | GU280_gp02                               | p.Leu1061Leu | Synonymous     |
| Control Post-Exp | 38957  | Trachea                 | 24910 | T   | C          | 111   | 100.0% | S          | GU280_gp02                               | p.Phe1119Leu | Non-synonymous |
| Control Post-Exp | 38957  | Trachea                 | 28317 | G   | T          | 2645  | 8.7%   | N          | GU280_gp10                               | p.Asp22Tyr   | Non-synonymous |
| Control Post-Exp | 38957  | Trachea                 | 28715 | T   | C          | 2593  | 9.2%   | N          | GU280_gp10                               | p.Asn154Asn  | Synonymous     |
| Control Post-Exp | 38960  | Nasal turbinates: R & L | 10108 | A   | G          | 128   | 50.0%  | ORF1ab     | 3C-like_proteinase,GU280_gp01            | p.Thr3284Ala | Non-synonymous |
| Control Post-Exp | 38960  | Trachea                 | 172   | T   | C          | 75    | 12.0%  | NON-CODING | NON-CODING                               |              |                |
| Control Post-Exp | 38960  | Trachea                 | 1953  | C   | A          | 90    | 5.6%   | ORF1ab     | GU280_gp01,nsp2                          | p.Ala565Ala  | Synonymous     |
| Control Post-Exp | 38960  | Trachea                 | 3914  | A   | G          | 68    | 11.8%  | ORF1ab     | GU280_gp01,nsp3                          | p.Lys1219Arg | Non-synonymous |
| Control Post-Exp | 38960  | Trachea                 | 4167  | T   | A          | 82    | 6.1%   | ORF1ab     | GU280_gp01,nsp3                          | p.Thr1303Thr | Synonymous     |
| Control Post-Exp | 38960  | Trachea                 | 4875  | T   | C          | 130   | 26.2%  | ORF1ab     | GU280_gp01,nsp3                          | p.Ser1539Ser | Synonymous     |
| Control Post-Exp | 38960  | Trachea                 | 7727  | T   | G          | 143   | 6.3%   | ORF1ab     | GU280_gp01,nsp3                          | p.Ile2490Ser | Non-synonymous |
| Control Post-Exp | 38960  | Trachea                 | 9934  | T   | G          | 1035  | 8.3%   | ORF1ab     | GU280_gp01,nsp4                          | p.Tyr3226Asp | Non-synonymous |
| Control Post-Exp | 38960  | Trachea                 | 14886 | G   | A          | 76    | 7.9%   | ORF1ab     | GU280_gp01,RNA-dependent_RNA_polymerase  | p.Gly4877Ser | Non-synonymous |
| Control Post-Exp | 38960  | Trachea                 | 17113 | T   | C          | 78    | 9.0%   | ORF1ab     | GU280_gp01,helicase                      | p.Leu5619Pro | Non-synonymous |
| Control Post-Exp | 38960  | Trachea                 | 18479 | C   | A          | 317   | 6.3%   | ORF1ab     | 3'-to-5'__exonuclease,GU280_gp01         | p.Leu6074Leu | Synonymous     |
| Control Post-Exp | 38960  | Trachea                 | 18972 | C   | T          | 839   | 28.1%  | ORF1ab     | 3'-to-5'__exonuclease,GU280_gp01         | p.His6239Tyr | Non-synonymous |
| Control Post-Exp | 38960  | Trachea                 | 19178 | C   | T          | 571   | 10.2%  | ORF1ab     | 3'-to-5'__exonuclease,GU280_gp01         | p.Cys6307Cys | Synonymous     |
| Control Post-Exp | 38960  | Trachea                 | 22211 | C   | T          | 802   | 8.6%   | S          | GU280_gp02                               | p.Ser219Leu  | Non-synonymous |
| Control Post-Exp | 38960  | Trachea                 | 22602 | T   | C          | 292   | 11.3%  | S          | GU280_gp02                               | p.Tyr349Tyr  | Synonymous     |
| Control Post-Exp | 38960  | Trachea                 | 23269 | G   | T          | 691   | 13.7%  | S          | GU280_gp02                               | p.Asp572Tyr  | Non-synonymous |
| Control Post-Exp | 38960  | Trachea                 | 24385 | G   | A          | 260   | 6.5%   | S          | GU280_gp02                               | p.Gly944Arg  | Non-synonymous |
| Control Post-Exp | 39057  | Nasal turbinates: R & L | 396   | T   | A          | 112   | 8.9%   | ORF1ab     | GU280_gp01,leader_protein                | p.Leu46Leu   | Synonymous     |
| Control Post-Exp | 39057  | Nasal turbinates: R & L | 4449  | C   | T          | 205   | 5.9%   | ORF1ab     | GU280_gp01,nsp3                          | p.Ala1397Ala | Synonymous     |
| Control Post-Exp | 39057  | Nasal turbinates: R & L | 15953 | C   | T          | 615   | 10.9%  | ORF1ab     | GU280_gp01,RNA-dependent_RNA_polymerase  | p.Ala5232Ala | Synonymous     |
| Control Post-Exp | 39057  | Nasal turbinates: R & L | 24850 | C   | T          | 127   | 5.5%   | S          | GU280_gp02                               | p.His1099Tyr | Non-synonymous |
| Control Post-Exp | 39057  | Trachea                 | 59    | C   | T          | 52    | 7.7%   | NON-CODING | NON-CODING                               |              |                |
| Control Post-Exp | 39057  | Trachea                 | 4474  | T   | A          | 320   | 6.3%   | ORF1ab     | GU280_gp01,nsp3                          | p.Tyr1406Asn | Non-synonymous |
| Control Post-Exp | 39057  | Trachea                 | 4692  | T   | C          | 289   | 5.2%   | ORF1ab     | GU280_gp01,nsp3                          | p.Ser1478Ser | Synonymous     |
| Control Post-Exp | 39057  | Trachea                 | 9231  | A   | T          | 66    | 7.6%   | ORF1ab     | GU280_gp01,nsp4                          | p.Arg2991Ser | Non-synonymous |
| Control Post-Exp | 39057  | Trachea                 | 17297 | C   | T          | 161   | 8.7%   | ORF1ab     | GU280_gp01,helicase                      | p.Val5680Val | Synonymous     |
| Control Post-Exp | 39057  | Trachea                 | 18884 | G   | T          | 979   | 7.9%   | ORF1ab     | 3'-to-5'__exonuclease,GU280_gp01         | p.Glu6209Asp | Non-synonymous |
| Control Post-Exp | 39057  | Trachea                 | 21320 | C   | A          | 132   | 5.3%   | ORF1ab     | 2'-O-ribose_methyltransferase,GU280_gp01 | p.Val7021Val | Synonymous     |
| Control Post-Exp | 39057  | Trachea                 | 26905 | T   | C          | 96    | 67.7%  | M          | GU280_gp05                               | p.Pro132Pro  | Synonymous     |
| Control Post-Exp | 39057  | Trachea                 | 29305 | T   | A          | 656   | 23.2%  | N          | GU280_gp10                               | p.Ile351Asn  | Non-synonymous |
| Control Post-Exp | 39078  | Nasal turbinates: R & L | 15953 | C   | T          | 1070  | 22.1%  | ORF1ab     | GU280_gp01,RNA-dependent_RNA_polymerase  | p.Ala5232Ala | Synonymous     |
| Control Post-Exp | 39078  | Trachea                 | 3276  | T   | A          | 251   | 5.2%   | ORF1ab     | GU280_gp01,nsp3                          | p.Val1006Val | Synonymous     |
| Control Post-Exp | 39078  | Trachea                 | 4808  | C   | T          | 301   | 6.6%   | ORF1ab     | GU280_gp01,nsp3                          | p.Ser1517Phe | Non-synonymous |
| Control Post-Exp | 39078  | Trachea                 | 5232  | C   | T          | 98    | 6.1%   | ORF1ab     | GU280_gp01,nsp3                          | p.Tyr1658Tyr | Synonymous     |
| Control Post-Exp | 39078  | Trachea                 | 5283  | T   | C          | 434   | 12.7%  | ORF1ab     | GU280_gp01,nsp3                          | p.Tyr1675Tyr | Synonymous     |
| Control Post-Exp | 39078  | Trachea                 | 7150  | T   | C          | 53    | 20.8%  | ORF1ab     | GU280_gp01,nsp3                          | p.Leu2298Leu | Synonymous     |
| Control Post-Exp | 39078  | Trachea                 | 7413  | C   | T          | 122   | 7.4%   | ORF1ab     | GU280_gp01,nsp3                          | p.Ile2385Ile | Synonymous     |
| Control Post-Exp | 39078  | Trachea                 | 11068 | T   | C          | 836   | 7.2%   | ORF1ab     | GU280_gp01,nsp6                          | p.Phe3604Leu | Non-synonymous |
| Control Post-Exp | 39078  | Trachea                 | 13252 | T   | C          | 813   | 8.0%   | ORF1ab     | GU280_gp01,nsp10                         | p.Cys4332Arg | Non-synonymous |
| Control Post-Exp | 39078  | Trachea                 | 15953 | C   | T          | 304   | 9.2%   | ORF1ab     | GU280_gp01,RNA-dependent_RNA_polymerase  | p.Ala5232Ala | Synonymous     |
| Control Post-Exp | 39078  | Trachea                 | 17062 | C   | A          | 168   | 11.9%  | ORF1ab     | GU280_gp01,helicase                      | p.Ser5602Tyr | Non-synonymous |
| Control Post-Exp | 39078  | Trachea                 | 21568 | C   | T          | 297   | 7.1%   | S          | GU280_gp02                               | p.Leu5Phe    | Non-synonymous |
| Control Post-Exp | 39078  | Trachea                 | 25461 | T   | C          | 286   | 6.3%   | ORF3a      | GU280_gp03                               | p.Phe28Leu   | Non-synonymous |
| Control Post-Exp | 39078  | Trachea                 | 26816 | T   | G          | 288   | 7.6%   | M          | GU280_gp05                               | p.Phe103Val  | Non-synonymous |
| Control Post-Exp | 39078  | Trachea                 | 28074 | C   | T          | 2208  | 7.2%   | ORF8       | GU280_gp09                               | p.Ala65Val   | Non-synonymous |

**Supplementary Table 4. Deep Sequence Analysis of SARS-CoV-2 Delta in Nasal Turbinates and Trachea from AR-701 mAb Post-exposure Treatment Group**

| Cohort              | Animal | Tissue                  | Start | Ref | AltAlleles | Depth | Freq  | ORF    | Protein                                  | Amino Acid   | Category       |
|---------------------|--------|-------------------------|-------|-----|------------|-------|-------|--------|------------------------------------------|--------------|----------------|
| SARS-Cov-2 Post-Exp | 37744  | Nasal turbinates: R & L | 5819  | C   | T          | 266   | 13.5% | ORF1ab | GU280_gp01, nsp3                         | p.Thr1854Ile | Non-synonymous |
| SARS-Cov-2 Post-Exp | 37744  | Nasal turbinates: R & L | 10226 | G   | T          | 783   | 7.3%  | ORF1ab | 3C-like_proteinase, GU280_gp01           | p.Arg3323Leu | Non-synonymous |
| SARS-Cov-2 Post-Exp | 37744  | Nasal turbinates: R & L | 15953 | C   | T          | 348   | 13.8% | ORF1ab | GU280_gp01, RNA-dependent_RNA_polymerase | p.Ala5232Ala | Synonymous     |
| SARS-Cov-2 Post-Exp | 37744  | Nasal turbinates: R & L | 25748 | A   | T          | 814   | 5.5%  | ORF3a  | GU280_gp03                               | p.Ile123Ile  | Synonymous     |
| SARS-Cov-2 Post-Exp | 37744  | Nasal turbinates: R & L | 26354 | G   | A          | 759   | 5.0%  | E      | GU280_gp04                               | p.Ala41Ala   | Synonymous     |
| SARS-Cov-2 Post-Exp | 37744  | Trachea                 | 4174  | T   | G          | 153   | 7.8%  | ORF1ab | GU280_gp01, nsp3                         | p.Ser1306Ala | Non-synonymous |
| SARS-Cov-2 Post-Exp | 37744  | Trachea                 | 4359  | T   | C          | 377   | 9.0%  | ORF1ab | GU280_gp01, nsp3                         | p.Ile1367Ile | Synonymous     |
| SARS-Cov-2 Post-Exp | 37744  | Trachea                 | 9672  | C   | T          | 1100  | 8.8%  | ORF1ab | GU280_gp01, nsp4                         | p.Phe3138Phe | Synonymous     |
| SARS-Cov-2 Post-Exp | 37744  | Trachea                 | 11068 | T   | C          | 548   | 7.3%  | ORF1ab | GU280_gp01, nsp6                         | p.Phe3604Leu | Non-synonymous |
| SARS-Cov-2 Post-Exp | 37744  | Trachea                 | 17003 | C   | T          | 335   | 31.9% | ORF1ab | GU280_gp01, helicase                     | p.Ile582Ile  | Synonymous     |
| SARS-Cov-2 Post-Exp | 37744  | Trachea                 | 17538 | T   | C          | 263   | 8.0%  | ORF1ab | GU280_gp01, helicase                     | p.Phe5761Leu | Non-synonymous |
| SARS-Cov-2 Post-Exp | 37744  | Trachea                 | 19825 | T   | C          | 219   | 6.4%  | ORF1ab | endoRNase, GU280_gp01                    | p.Ile523Thr  | Non-synonymous |
| SARS-Cov-2 Post-Exp | 37744  | Trachea                 | 22354 | T   | C          | 531   | 6.8%  | S      | GU280_gp02                               | p.Tyr267His  | Non-synonymous |
| SARS-Cov-2 Post-Exp | 38469  | Nasal turbinates: R & L | 8347  | C   | G          | 67    | 13.4% | ORF1ab | GU280_gp01, nsp3                         | p.Arg2697Gly | Non-synonymous |
| SARS-Cov-2 Post-Exp | 38469  | Trachea                 | 24909 | A   | T          | 176   | 5.1%  | S      | GU280_gp02                               | p.Thr1118Thr | Synonymous     |
| SARS-Cov-2 Post-Exp | 38579  | Nasal turbinates: R & L | 3995  | C   | T          | 259   | 5.0%  | ORF1ab | GU280_gp01, nsp3                         | p.Thr1246Ile | Non-synonymous |
| SARS-Cov-2 Post-Exp | 38579  | Nasal turbinates: R & L | 7011  | T   | G          | 91    | 5.5%  | ORF1ab | GU280_gp01, nsp3                         | p.Gly2251Gly | Synonymous     |
| SARS-Cov-2 Post-Exp | 38579  | Nasal turbinates: R & L | 26525 | G   | T          | 445   | 12.4% | M      | GU280_gp05                               | p.Gly6Cys    | Non-synonymous |
| SARS-Cov-2 Post-Exp | 38941  | Nasal turbinates: R & L | 15953 | C   | T          | 795   | 8.7%  | ORF1ab | GU280_gp01, RNA-dependent_RNA_polymerase | p.Ala5232Ala | Synonymous     |
| SARS-Cov-2 Post-Exp | 38941  | Nasal turbinates: R & L | 23628 | T   | C          | 721   | 5.8%  | S      | GU280_gp02                               | p.Ile691Ile  | Synonymous     |

**Supplementary Table 5. Deep Sequence Analysis of SARS-CoV-2 Delta in Nasal Turbinates and Trachea from AR-701 mAb Pre/Post-exposure Treatment Group**

| Cohort                  | Animal | Tissue                  | Start | Ref | AltAlleles | Depth | Freq  | ORF    | Protein                                         | Amino Acid   | Category       |
|-------------------------|--------|-------------------------|-------|-----|------------|-------|-------|--------|-------------------------------------------------|--------------|----------------|
| SARS-Cov-2 Pre/Post-Exp | 38323  | Nasal turbinates: R & L | 19010 | C   | T          | 419   | 58.5% | ORF1ab | 3'-to-5' exonuclease, GU280_gp01                | p.Phe6251Phe | Synonymous     |
| SARS-Cov-2 Pre/Post-Exp | 38323  | Nasal turbinates: R & L | 22973 | C   | A          | 217   | 27.2% | S      | GU280_gp02                                      | p.Ala473Asp  | Non-synonymous |
| SARS-Cov-2 Pre/Post-Exp | 38885  | Nasal turbinates: R & L | 376   | T   | C          | 254   | 5.1%  | ORF1ab | GU280_gp01, leader_protein                      | p.Ser40Pro   | Non-synonymous |
| SARS-Cov-2 Pre/Post-Exp | 38885  | Nasal turbinates: R & L | 2008  | A   | G          | 136   | 8.8%  | ORF1ab | GU280_gp01, nsp2                                | p.Met584Val  | Non-synonymous |
| SARS-Cov-2 Pre/Post-Exp | 38885  | Nasal turbinates: R & L | 3376  | A   | T          | 243   | 5.8%  | ORF1ab | GU280_gp01, nsp3                                | p.Ile1040Phe | Non-synonymous |
| SARS-Cov-2 Pre/Post-Exp | 38885  | Nasal turbinates: R & L | 3955  | A   | G          | 155   | 6.5%  | ORF1ab | GU280_gp01, nsp3                                | p.Lys1233Glu | Non-synonymous |
| SARS-Cov-2 Pre/Post-Exp | 38885  | Nasal turbinates: R & L | 13465 | T   | G          | 521   | 5.4%  | ORF1ab | GU280_gp01, nsp11, RNA-dependent_RNA_polymerase | p.Val4403Gly | Non-synonymous |
| SARS-Cov-2 Pre/Post-Exp | 38885  | Nasal turbinates: R & L | 15662 | T   | C          | 63    | 7.9%  | ORF1ab | GU280_gp01, RNA-dependent_RNA_polymerase        | p.Asn5135Asn | Synonymous     |
| SARS-Cov-2 Pre/Post-Exp | 38885  | Nasal turbinates: R & L | 17345 | C   | T          | 67    | 22.4% | ORF1ab | GU280_gp01, helicase                            | p.Val5696Val | Synonymous     |
| SARS-Cov-2 Pre/Post-Exp | 38885  | Nasal turbinates: R & L | 18879 | C   | A          | 867   | 5.7%  | ORF1ab | 3'-to-5' exonuclease, GU280_gp01                | p.His6208Asn | Non-synonymous |
| SARS-Cov-2 Pre/Post-Exp | 38885  | Nasal turbinates: R & L | 21753 | T   | C          | 623   | 5.9%  | S      | GU280_gp02                                      | p.His66His   | Synonymous     |
| SARS-Cov-2 Pre/Post-Exp | 38885  | Nasal turbinates: R & L | 24336 | T   | C          | 171   | 7.0%  | S      | GU280_gp02                                      | p.Ser927Ser  | Synonymous     |
| SARS-Cov-2 Pre/Post-Exp | 38885  | Nasal turbinates: R & L | 26026 | C   | T          | 786   | 24.7% | ORF3a  | GU280_gp03                                      | p.Ser216Leu  | Non-synonymous |
| SARS-Cov-2 Pre/Post-Exp | 38885  | Trachea                 | 4174  | T   | G          | 131   | 6.1%  | ORF1ab | GU280_gp01, nsp3                                | p.Ser1306Ala | Non-synonymous |
| SARS-Cov-2 Pre/Post-Exp | 38885  | Trachea                 | 7401  | T   | C          | 139   | 46.8% | ORF1ab | GU280_gp01, nsp3                                | p.Val2381Val | Synonymous     |
| SARS-Cov-2 Pre/Post-Exp | 38885  | Trachea                 | 15953 | C   | T          | 154   | 59.1% | ORF1ab | GU280_gp01, RNA-dependent_RNA_polymerase        | p.Ala5232Ala | Synonymous     |
| SARS-Cov-2 Pre/Post-Exp | 38885  | Trachea                 | 16422 | T   | G          | 146   | 8.9%  | ORF1ab | GU280_gp01, helicase                            | p.Leu5389Val | Non-synonymous |
| SARS-Cov-2 Pre/Post-Exp | 38885  | Trachea                 | 19414 | C   | T          | 562   | 5.7%  | ORF1ab | 3'-to-5' exonuclease, GU280_gp01                | p.Ser6386Leu | Non-synonymous |
| SARS-Cov-2 Pre/Post-Exp | 38885  | Trachea                 | 21098 | T   | C          | 157   | 6.4%  | ORF1ab | 2'-O-ribose_methyltransferase, GU280_gp01       | p.Phe6947Phe | Synonymous     |
| SARS-Cov-2 Pre/Post-Exp | 38929  | Nasal turbinates: R & L | 10996 | C   | T          | 1399  | 5.8%  | ORF1ab | GU280_gp01, nsp6                                | p.His3580Tyr | Non-synonymous |
| SARS-Cov-2 Pre/Post-Exp | 38929  | Nasal turbinates: R & L | 24480 | A   | G          | 936   | 9.4%  | S      | GU280_gp02                                      | p.Leu975Leu  | Synonymous     |
| SARS-Cov-2 Pre/Post-Exp | 38929  | Nasal turbinates: R & L | 24575 | C   | T          | 731   | 97.9% | S      | GU280_gp02                                      | p.Thr1007Ile | Non-synonymous |
| SARS-Cov-2 Pre/Post-Exp | 38929  | Nasal turbinates: R & L | 24668 | T   | G          | 653   | 5.1%  | S      | GU280_gp02                                      | p.Val1038Gly | Non-synonymous |
| SARS-Cov-2 Pre/Post-Exp | 38929  | Nasal turbinates: R & L | 24932 | T   | A          | 148   | 6.1%  | S      | GU280_gp02                                      | p.Val1126Asp | Non-synonymous |
| SARS-Cov-2 Pre/Post-Exp | 39007  | Nasal turbinates: R & L | 822   | C   | T          | 171   | 99.4% | ORF1ab | GU280_gp01, nsp2                                | p.Asn188Asn  | Synonymous     |
| SARS-Cov-2 Pre/Post-Exp | 39007  | Nasal turbinates: R & L | 4034  | T   | G          | 212   | 11.3% | ORF1ab | GU280_gp01, nsp3                                | p.Ile1259Ser | Non-synonymous |
| SARS-Cov-2 Pre/Post-Exp | 39007  | Nasal turbinates: R & L | 4923  | T   | C          | 68    | 26.5% | ORF1ab | GU280_gp01, nsp3                                | p.Asn1555Asn | Synonymous     |
| SARS-Cov-2 Pre/Post-Exp | 39007  | Nasal turbinates: R & L | 7406  | T   | G          | 104   | 9.6%  | ORF1ab | GU280_gp01, nsp3                                | p.Met2383Arg | Non-synonymous |
| SARS-Cov-2 Pre/Post-Exp | 39007  | Nasal turbinates: R & L | 9509  | T   | C          | 471   | 5.7%  | ORF1ab | GU280_gp01, nsp4                                | p.Leu3084Pro | Non-synonymous |
| SARS-Cov-2 Pre/Post-Exp | 39007  | Nasal turbinates: R & L | 10041 | T   | C          | 1499  | 6.1%  | ORF1ab | GU280_gp01, nsp4                                | p.Val3261Val | Synonymous     |
| SARS-Cov-2 Pre/Post-Exp | 39007  | Nasal turbinates: R & L | 11302 | T   | A          | 1059  | 5.3%  | ORF1ab | GU280_gp01, nsp6                                | p.Cys3682Ser | Non-synonymous |
| SARS-Cov-2 Pre/Post-Exp | 39007  | Nasal turbinates: R & L | 12222 | A   | G          | 639   | 7.5%  | ORF1ab | GU280_gp01, nsp8                                | p.Lys3988Lys | Synonymous     |
| SARS-Cov-2 Pre/Post-Exp | 39007  | Nasal turbinates: R & L | 12441 | A   | G          | 459   | 8.1%  | ORF1ab | GU280_gp01, nsp8                                | p.Ile4061Met | Non-synonymous |
| SARS-Cov-2 Pre/Post-Exp | 39007  | Nasal turbinates: R & L | 12518 | C   | T          | 416   | 98.8% | ORF1ab | GU280_gp01, nsp8                                | p.Thr4087Ile | Non-synonymous |
| SARS-Cov-2 Pre/Post-Exp | 39007  | Nasal turbinates: R & L | 13853 | C   | T          | 783   | 5.1%  | ORF1ab | GU280_gp01, RNA-dependent_RNA_polymerase        | p.Asp4532Asp | Synonymous     |
| SARS-Cov-2 Pre/Post-Exp | 39007  | Nasal turbinates: R & L | 15282 | T   | C          | 134   | 9.0%  | ORF1ab | GU280_gp01, RNA-dependent_RNA_polymerase        | p.Trp5009Arg | Non-synonymous |
| SARS-Cov-2 Pre/Post-Exp | 39007  | Nasal turbinates: R & L | 15799 | A   | G          | 95    | 6.3%  | ORF1ab | GU280_gp01, RNA-dependent_RNA_polymerase        | p.Gln5181Arg | Non-synonymous |
| SARS-Cov-2 Pre/Post-Exp | 39007  | Nasal turbinates: R & L | 16180 | G   | T          | 194   | 5.2%  | ORF1ab | GU280_gp01, RNA-dependent_RNA_polymerase        | p.Trp5308Leu | Non-synonymous |
| SARS-Cov-2 Pre/Post-Exp | 39007  | Nasal turbinates: R & L | 19304 | T   | C          | 520   | 12.9% | ORF1ab | 3'-to-5' exonuclease, GU280_gp01                | p.His6349His | Synonymous     |
| SARS-Cov-2 Pre/Post-Exp | 39007  | Nasal turbinates: R & L | 21042 | A   | G          | 475   | 12.8% | ORF1ab | 2'-O-ribose_methyltransferase, GU280_gp01       | p.Met6929Val | Non-synonymous |
| SARS-Cov-2 Pre/Post-Exp | 39007  | Nasal turbinates: R & L | 21328 | C   | A          | 220   | 17.3% | ORF1ab | 2'-O-ribose_methyltransferase, GU280_gp01       | p.Ala7024Glu | Non-synonymous |
| SARS-Cov-2 Pre/Post-Exp | 39007  | Nasal turbinates: R & L | 22803 | T   | C          | 107   | 16.8% | S      | GU280_gp02                                      | p.Ile416Ile  | Synonymous     |
| SARS-Cov-2 Pre/Post-Exp | 39007  | Nasal turbinates: R & L | 24830 | T   | C          | 116   | 10.3% | S      | GU280_gp02                                      | p.Val1092Ala | Non-synonymous |
| SARS-Cov-2 Pre/Post-Exp | 39007  | Nasal turbinates: R & L | 25630 | T   | C          | 209   | 12.9% | ORF3a  | GU280_gp03                                      | p.Leu84Pro   | Non-synonymous |

**Supplementary Table 6. ANOVA Dunnett's One-Sided Multiple Comparisons Statistical Analysis of Lung Pathology**

| Treatment Group                                        | Mean Difference | 95% CI of Difference | Adjusted P Value | Significance Difference Among Means (P<0.05) |
|--------------------------------------------------------|-----------------|----------------------|------------------|----------------------------------------------|
| Controls (n=8) vs. SARS-CoV-2 Pre-exposure (n=4)       | 7.988           | 2.269 to 13.71       | 0.0059           | Yes                                          |
| Controls (n=8) vs. SARS-CoV-2 Post-exposure (n=4)      | 7.125           | 1.406 to 12.84       | 0.0135           | Yes                                          |
| Controls (n=8) vs. SARS-CoV-2 Pre/Post- exposure (n=4) | 7.063           | 1.344 to 12.78       | 0.143            | No                                           |

**Supplementary Table 7. Area Under the Curve (AUC) Tukey One-Way ANOVA Statistical Analysis of Cytokines in BAL samples**

|                                | Controls (n=8) |        | SARS-CoV-2 Pre-Exposure (n=4) |       |              | SARS-CoV-2 Pre/Post-Exposure (n=4) |       |              | SARS-CoV-2 Post-Exposure (n=4) |        |                   |
|--------------------------------|----------------|--------|-------------------------------|-------|--------------|------------------------------------|-------|--------------|--------------------------------|--------|-------------------|
|                                | Mean           | SEM    | Mean                          | SEM   | P            | Mean                               | SEM   | P            | Mean                           | SEM    | P                 |
| <b>CCL2</b>                    | 2095.3         | 254.7  | 852.7                         | 246.6 | <b>0.088</b> | 683.2                              | 130.1 | <b>0.048</b> | 8891                           | 1052.4 | <b>&lt;0.0001</b> |
| <b>CCL11</b>                   | 222.8          | 77.6   | 7.2                           | 1.7   | 0.112        | 10.7                               | 4.8   | 0.119        | 134.9                          | 77.3   | 0.731             |
| <b>CXCL8</b>                   | 283.6          | 100.2  | 29.3                          | 12.6  | 0.131        | 9.3                                | 3.8   | 0.097        | 343.6                          | 65.7   | 0.935             |
| <b>CXCL9</b>                   | 198.7          | 26.3   | 13.5                          | 3.9   | <b>0.028</b> | 11.7                               | 4.9   | <b>0.027</b> | 484.1                          | 105.6  | <b>0.001</b>      |
| <b>CXCL10</b>                  | 70.3           | 9.4    | 27.64                         | 6.5   | 0.593        | 22.4                               | 3.5   | 0.506        | 414.9                          | 93.9   | <b>&lt;0.0001</b> |
| <b>CXCL11</b>                  | 2300.2         | 439.8  | 179.9                         | 33.0  | <b>0.010</b> | 107.5                              | 14.8  | <b>0.008</b> | 860.8                          | 686.7  | 0.091             |
| <b>CXCL13</b>                  | 2684.7         | 516.3  | 268.8                         | 46.0  | <b>0.027</b> | 255.6                              | 33.5  | <b>0.265</b> | 2416.8                         | 904.7  | 0.985             |
| <b>G-CSF</b>                   | 848.8          | 135.3  | 267.8                         | 46.2  | <b>0.008</b> | 396.0                              | 36.5  | <b>0.040</b> | 331.4                          | 92.8   | <b>0.018</b>      |
| <b>IL-1<math>\beta</math></b>  | 18.9           | 3.6    | 1.1                           | 0.02  | <b>0.004</b> | 2.5                                | 1.0   | <b>0.008</b> | 6.2                            | 3.9    | <b>0.042</b>      |
| <b>IL-1RA</b>                  | 8731.8         | 2486.8 | 868.8                         | 111.3 | <b>0.039</b> | 1545                               | 133.3 | 0.062        | 2621                           | 545.4  | 0.127             |
| <b>IL-6</b>                    | 323.3          | 104.6  | 3.7                           | 0.4   | <b>0.047</b> | 29.4                               | 21.7  | 0.072        | 31.7                           | 16.1   | 0.075             |
| <b>IFN-<math>\alpha</math></b> | 155.2          | 38.8   | 0.7                           | 0     | <b>0.029</b> | 0.7                                | 0     | <b>0.029</b> | 73.5                           | 57.6   | 0.346             |
| <b>TNF-<math>\alpha</math></b> | 10.3           | 3.5    | 1.225                         | 0     | 0.108        | 1.429                              | 0.2   | 0.118        | 4.0                            | 1.2    | 0.333             |

## References

1. Van Rompay, K.K.A., *et al.* Early post-infection treatment of SARS-CoV-2 infected macaques with human convalescent plasma with high neutralizing activity had no antiviral effects but moderately reduced lung inflammation. *PLoS Pathog* **18**, e1009925 (2022).
